# Supplementary material
Source: PubMed Central journal article supplement (PMC4120331)
Supplement: NIHMS607567-supplement-supplementary_material.pdf [file NIHMS607567-supplement-supplementary_material.pdf]

Supplementary material for Erdogan B, et al., Methylation of promoters of microRNAs and their host genes in myelodysplastic syndromes, *Leukemia & Lymphoma*, 2013; doi: 10.3109/10428194.2013.790542.

Supplementary Table 1. Patient characteristics for samples used in the pyrosequencing studies.

| Age   | Gender  | Patient Set | Patient Diagnosis                          | Treatment Status                                                                                                       |
|-------|---------|-------------|--------------------------------------------|------------------------------------------------------------------------------------------------------------------------|
| 76    | F       | N.C         | joint replacement                          |                                                                                                                        |
| 60    | M       | N.C         | joint replacement                          |                                                                                                                        |
| 51    | F       | N.C         | joint replacement                          |                                                                                                                        |
| 63    | F       | N.C         | joint replacement                          |                                                                                                                        |
| 80    | M       | N.C         | h/o new dx FL                              |                                                                                                                        |
| 59    | F       | N.C         | PRIOR FL                                   |                                                                                                                        |
| 12    | M       | N.C         | NEW DX B CELL LYMPHOMA                     |                                                                                                                        |
| 65    | F       | N.C         | RELAPSED CUT DLBCL                         |                                                                                                                        |
| 64    | F       | N.C         | DLBCL IN 1998                              |                                                                                                                        |
| 14    | F       | N.C         | RHABDOMYOSARCOMA                           |                                                                                                                        |
| 49    | F       | N.C         | RELAPSED FL                                |                                                                                                                        |
| 64    | M       | N.C         | PRIOR FL                                   |                                                                                                                        |
| 57    | F       | N.C         | NEW DX BCL                                 |                                                                                                                        |
| 62    | M       | N.C         | DLBCL                                      |                                                                                                                        |
| 38    | F       | N.C         | NEW DX DLBCL                               |                                                                                                                        |
| 38    | M       | N.C         | relapsed cHL                               |                                                                                                                        |
| 21    | M       | N.C         | NEW LARGE BCL OF MEDIASTINUM               |                                                                                                                        |
| 33    | F       | N.C         | new NSHL                                   |                                                                                                                        |
| 60    | M       | N.C         | new dx CNS DLBCL                           |                                                                                                                        |
| 72    | M       | N.C         | new dx intraventricular mass               |                                                                                                                        |
| 39    | F       | N.C         | staging for follicular lymphoma            |                                                                                                                        |
| 72    | M       | N.C         | s/p SCT, now relapsed mantle cell lymphoma |                                                                                                                        |
| 52.23 | average |             |                                            |                                                                                                                        |
| 19.49 | stdev   |             |                                            |                                                                                                                        |
|       | 45% M   |             |                                            |                                                                                                                        |
| 63    | F       | MDS         | RCMD                                       | growth factors                                                                                                         |
| 72    | M       | MDS         | RCMD                                       | untreated                                                                                                              |
| 74    | F       | MDS         | RCMD                                       | untreated                                                                                                              |
| 69    | M       | MDS         | RCMD                                       | untreated                                                                                                              |
| 78    | F       | MDS         | RCMD                                       | untreated                                                                                                              |
| 66    | F       | MDS         | RA                                         | untreated                                                                                                              |
| 78    | F       | MDS         | RA                                         | growth factors                                                                                                         |
| 73    | M       | MDS         | RA                                         | immunosuppressives                                                                                                     |
| 76    | M       | MDS         | RAEB-2                                     | chemotherapy                                                                                                           |
| 59    | M       | MDS         | RCMD                                       | azacytidine 9 months prior                                                                                             |
| 69    | M       | MDS         | RAEB-2                                     | thalidomide                                                                                                            |
| 47    | M       | MDS         | RCMD                                       | chemotherapy                                                                                                           |
| 50    | F       | MDS         | RCMD                                       | chemotherapy                                                                                                           |
| 69    | M       | MDS         | RCMD                                       | azacytidine 12 months prior                                                                                            |
| 56    | F       | MDS         | RA                                         | growth factors                                                                                                         |
| 58    | M       | MDS         | RCMD                                       | azacytidine 24 months prior, followed by chemotherapy and cord blood SCT                                               |
| 73    | M       | MDS         | RA                                         | untreated                                                                                                              |
| 51    | M       | MDS         | RARS                                       | immunosuppressives                                                                                                     |
| 87    | M       | MDS         | RCMD                                       | growth factors                                                                                                         |
| 60    | M       | MDS         | RCMD                                       | thalidomide 18 months ago x 1y, decitabine 6 months prior, then panobinostat x 3 months                                |
| 66.4  | average |             | 60% RCMD (12)                              |                                                                                                                        |
| 10.64 | stdev   |             | also includes 5 RA, 1 RARS, 2 RAEB2        |                                                                                                                        |
|       | 65% M   |             |                                            |                                                                                                                        |
| 66    | M       | MDS         | RA                                         | started on decitabine x 4 cycles, now vidaza x 1 cycle                                                                 |
| 58    | M       | MDS         | RCMD                                       | on azacytidine for 2 years, stable                                                                                     |
| 57    | M       | MDS         | RAEB-2                                     | s/p 4c azacytidine no response                                                                                         |
| 79    | M       | MDS         | RAEB-2                                     | on decitabine x 3 cycles with no response                                                                              |
| 56    | M       | MDS         | RAEB-1                                     | azacytidine x 5 cycles, then enocitabine x 2months                                                                     |
| 78    | M       | MDS         | RCMD                                       | s/p azacytidine x 8 cycles with initial response, now worsening anemia due to renal failure (polyclonal plasmacytosis) |
| 65.67 | average |             | 1 RA, 2 RCMD, 1 RAEB1, 2 RAEB2             |                                                                                                                        |
| 10.56 | stdev   |             |                                            |                                                                                                                        |
|       | 100% M  |             |                                            |                                                                                                                        |

Supplementary Table 2. Primers used in pyrosequencing (all sequences listed from 5' to 3').

| Host Gene Name | Forward Primer                                                       | Reverse Primer                 | Sequencing Primer      | Amplicon Length [bp] |
|----------------|----------------------------------------------------------------------|--------------------------------|------------------------|----------------------|
| BIRC6          | GTAAGGGAGGGGGTTTTTATT                                                | Bio-CCAACCTCCCAATTTCTTCCTAT    | GGTTAATTTTTTTTTTTTGT   | 127                  |
| TECR           | GGATGTTGTTTGTGTTATTTAAT                                              | Bio-CCACCAATCCAAAAAATCTCTAC    | AATCCAAAAAATCTCTAC     | 142                  |
| IGF2           | Bio-GGGATTTGGTTGAGGTTTTAA                                            | CCATCCCCAATTTCTAAAATACC        | TTTTTTTGTGGGGTAG       | 275                  |
| IGF2-DMRO      | AGGGGGTTTATTTTTTAGGAAGTA                                             | Bio-AACAAAAACCACTAACACACAACCTA | GGGTTTATTTTTTAGGAAGTAT | 85                   |
| PANK3          | GTTAGGTTTGAGGGGAGGAAT                                                | Bio-CAACCCCTCTTACAAAATTTCT     | GGTTTGAGGGGAGGA        | 164                  |
| WWP2           | Bio-TGGTTAGTATTGAGAGTTTG<br>GTTAGTTT                                 | CCCAACTCCTCTCTACTTCC           | TTAGTTTTTTAGGGTTAGG    | 112                  |
| EVL1           | Bio-GAGGGAGGTGGGGTGAATAGT                                            | AAACCCCCACCCCTACCATCT          | ACCCCTACCATCTTA        | 284                  |
| RPS11          | Bio-GGGAAGATGGAGGATATTT<br>AGGT                                      | CCCCTCCACTCCAATTAATCTC         | ATTAATCTCTAAAAATAAT    | 167                  |
| PPARGC1B       | QIAGEN Pyromark CpG Assay<br>Hs_hsa-mir-378_01_PM Cat<br>#PM00022519 |                                |                        | 176                  |
| ZNF207         | QIAGEN Pyromark CpG Assay Hs_<br>ZNF207_01_PM Cat #PM00177688        |                                |                        | 212                  |
| SRSF2          | QIAGEN Pyromark CpG Assay Hs_<br>MFSD11_02_PM Cat#PM00065359         |                                |                        | 180                  |
| SFRP2          | QIAGEN Pyromark CpG Assay Hs_<br>SFRP2_01_PM Cat#PM00018802          |                                |                        | 110                  |

Supplementary Table 3. Expression changes of miRNAs and their host genes during an assay of myeloid maturation (HL60/ATRA).

| miRNAs  | Fold increase | Host Genes | Fold increase |
|---------|---------------|------------|---------------|
| miR-103 | 1.22          | PANK3      | 1.50          |
| miR-140 | 1.30          | WWP2       | 1.52          |
| miR-150 | 1.01          | RPS11      | 1.28          |
| miR-342 | 1.13          | EVL        | 1.46          |
| miR-378 | -0.83         | PPARGC1B   | 1.18          |
| miR-483 | 1.20          | IGF2       | not available |
| miR-632 | 1.09          | ZNF207     | 1.25          |
| miR-636 | 1.21          | SFRS2      | 1.30          |

Supplementary Table 4. Compiled methylation results (as percent methylation) for methylation regions examined by pyrosequencing in promoters of WWP2, PPARGC1B, IGF2, ZNF207, and SFRS2. P values obtained from two-tailed t-test analysis of MDS samples (untreated or treated) compared to normal controls (NC).

|                 | Region<br>1 | Region<br>2 | Region<br>3 | Region<br>4 | Region<br>5 | Region<br>6 | Region<br>7 |
|-----------------|-------------|-------------|-------------|-------------|-------------|-------------|-------------|
| <b>SRSF2</b>    |             |             |             |             |             |             |             |
| NC (22)         |             |             |             |             |             |             |             |
| average         | 1.318       | 2.091       | 1.682       | 4.455       | 2.909       |             |             |
| stdev           | 0.568       | 0.921       | 1.729       | 6.486       | 4.363       |             |             |
| MDS (20)        |             |             |             |             |             |             |             |
| average         | 3.100       | 6.050       | 3.450       | 11.450      | 5.500       |             |             |
| stdev           | 4.447       | 8.599       | 5.000       | 21.010      | 10.605      |             |             |
| P value vs NC   | 0.091       | 0.054       | 0.147       | 0.167       | 0.319       |             |             |
| MDS post Rx (6) |             |             |             |             |             |             |             |
| average         | 1.833       | 2.333       | 1.667       | 4.500       | 2.833       |             |             |
| stdev           | 0.753       | 1.033       | 0.816       | 2.074       | 1.722       |             |             |
| P value vs NC   | 0.165       | 0.618       | 0.976       | 0.978       | 0.949       |             |             |
| <b>ZNF207</b>   |             |             |             |             |             |             |             |
| NC (22)         |             |             |             |             |             |             |             |
| average         | 13.227      | 7.545       | 5.591       | 8.500       | 12.682      |             |             |
| stdev           | 8.772       | 4.964       | 4.067       | 6.292       | 8.632       |             |             |
| MDS (20)        |             |             |             |             |             |             |             |
| average         | 24.200      | 14.250      | 11.900      | 15.350      | 24.500      |             |             |
| stdev           | 17.356      | 10.290      | 9.239       | 11.926      | 19.720      |             |             |
| P value         | 0.017       | 0.013       | 0.009       | 0.029       | 0.020       |             |             |
| MDS post Rx (6) |             |             |             |             |             |             |             |
| average         | 9.667       | 5.667       | 5.167       | 5.833       | 9.833       |             |             |
| stdev           | 2.658       | 1.366       | 2.483       | 1.835       | 1.941       |             |             |
| P value         | 0.112       | 0.128       | 0.755       | 0.095       | 0.167       |             |             |
| <b>IGF2</b>     |             |             |             |             |             |             |             |
| NC (32)         |             |             |             |             |             |             |             |
| average         | 7.156       | 3.156       | 2.469       | 5.469       | 4.531       | 34.625      | 97.156      |
| stdev           | 9.381       | 2.477       | 4.040       | 12.914      | 14.675      | 4.654       | 6.811       |
| MDS (20)        |             |             |             |             |             |             |             |
| average         | 21.471      | 2.706       | 1.000       | 1.824       | 1.706       | 33.000      | 90.950      |
| stdev           | 31.814      | 1.359       | 0.612       | 1.286       | 1.263       | 8.681       | 15.856      |
| P value         | 0.087       | 0.415       | 0.052       | 0.123       | 0.288       | 0.448       | 0.111       |
| MDS post Rx (6) |             |             |             |             |             |             |             |
| average         | 16.167      | 13.833      | 11.833      | 14.833      | 26.333      | 30.167      | 96.500      |
| stdev           | 28.330      | 28.017      | 26.536      | 28.067      | 38.862      | 5.601       | 4.037       |
| P value         | 0.474       | 0.394       | 0.427       | 0.457       | 0.230       | 0.113       | 0.754       |
| <b>PPARGC1B</b> |             |             |             |             |             |             |             |
| NC (21)         |             |             |             |             |             |             |             |
| average         | 4.333       | 7.000       | 4.714       | 3.158       |             |             |             |
| stdev           | 3.152       | 3.987       | 4.540       | 5.284       |             |             |             |
| MDS (20)        |             |             |             |             |             |             |             |
| average         | 6.950       | 10.850      | 9.400       | 12.706      |             |             |             |
| stdev           | 4.383       | 7.386       | 9.064       | 14.848      |             |             |             |
| P value         | 0.036       | 0.048       | 0.047       | 0.021       |             |             |             |
| MDS post Rx (6) |             |             |             |             |             |             |             |
| average         | 4.167       | 5.500       | 5.500       | 5.167       |             |             |             |
| stdev           | 1.169       | 3.082       | 2.345       | 2.787       |             |             |             |
| P value         | 0.844       | 0.349       | 0.576       | 0.244       |             |             |             |
| <b>WWP2</b>     |             |             |             |             |             |             |             |
| NC (19)         |             |             |             |             |             |             |             |
| average         | 4.706       | 1.235       | 1.353       | 1.235       | 3.059       | 4.125       | 2.143       |
| stdev           | 1.829       | 0.437       | 0.606       | 0.752       | 1.197       | 1.746       | 1.099       |
| MDS (20)        |             |             |             |             |             |             |             |
| average         | 6.944       | 2.722       | 2.944       | 3.056       | 4.833       | 6.875       | 3.933       |
| stdev           | 3.455       | 2.052       | 2.313       | 2.338       | 2.834       | 4.759       | 2.764       |
| P value         | 0.023       | 0.007       | 0.011       | 0.005       | 0.023       | 0.043       | 0.032       |
| MDS post Rx (6) |             |             |             |             |             |             |             |
| average         | 3.667       | 2.000       | 1.667       | 1.667       | 3.000       | 4.667       | 3.333       |
| stdev           | 0.577       | 1.000       | 1.155       | 0.577       | 1.000       | 1.528       | 1.155       |
| P value         | 0.053       | 0.262       | 0.557       | 0.247       | 0.762       | 0.674       | 0.215       |

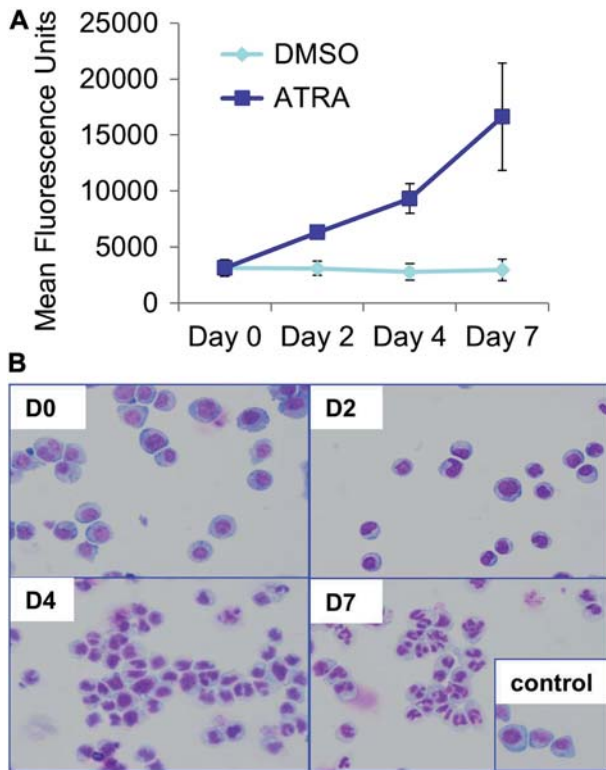

Supplementary Figure 1. (a) Induction of CD11b levels through 7 days of ATRA treatment. Light blue line indicates DMSO treated cells as a vehicle control; dark blue line indicates ATRA treated cells ( $P = < 0.0001$  by interactive regression model comparing treatments over time) (b) Wright stained cytopsin slides of  $1 \mu\text{M}$  ATRA treated HL60 cells on experimental days 0, 2, 4 and 7 ( $40\times$ ). DMSO treated cells at day 7 are shown in the insert as a vehicle control.
